# Supplementary material
Source: ML conference proceedings conference paper supplement (https://openaccess.thecvf.com/content/CVPR2021/html/Song_Pareidolia_Face_Reenactment_CVPR_2021_paper.html)
Supplement: Supplementary file 1 [file Song_Pareidolia_Face_Reenactment_CVPR_2021_supplemental.zip]

Archive with 4 entries (4 files):
- 00819-supp.pdf
- __MACOSX/._00819-supp.pdf
- 00819-supp.mp4
- __MACOSX/._00819-supp.mp4
